# Supplementary material for: Platinum species in the pores of NaX, NaY and NaA zeolites studied using EPR, XAS and FTIR spectroscopies
Source: Royal Society of Chemistry journal article supplement (doi:10.1039/b718932j), 2008-01-01
Supplement: b718932j.pdf [file b718932j.pdf]

**Supplementary information:**

**Platinum species in the pores of NaX, NaY and NaA zeolites studied using EPR, XAS and FTIR spectroscopies**

Yasar Akdogan, Christina Vogt, Matthias Bauer, Helmut Bertagnolli, Liviu Giurgiu, Emil Roduner

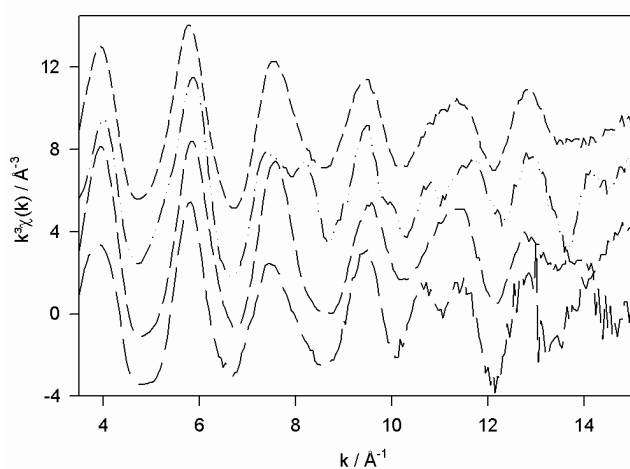

**Fig. S1:** Experimental  $k^3 \cdot \chi(k)$  functions from 3.5 – 15  $\text{\AA}^{-1}$  of Pt/zeolite samples calcined with  $\text{O}_2$ . From top to bottom: 6% Pt/NaY (short dash line), 6% Pt/NaA (double dotted dashed line), 12% Pt/NaX (heating rate 0.5 K/min, medium dashed line), and 6% Pt/NaX (heating rate 1.25 K/min, long dashed line).
